# Supplementary material for: Benzoate mediates the simultaneous repression of anaerobic 4-methylbenzoate and succinate utilization in Magnetospirillum sp. strain pMbN1
Source: PubMed Central journal article supplement (PMC4268860; doi:10.1186/s12866-014-0269-4), 2014-10-27
Supplement: 12866_2014_269_MOESM1_ESM.pdf [file 12866_2014_269_MOESM1_ESM.pdf]

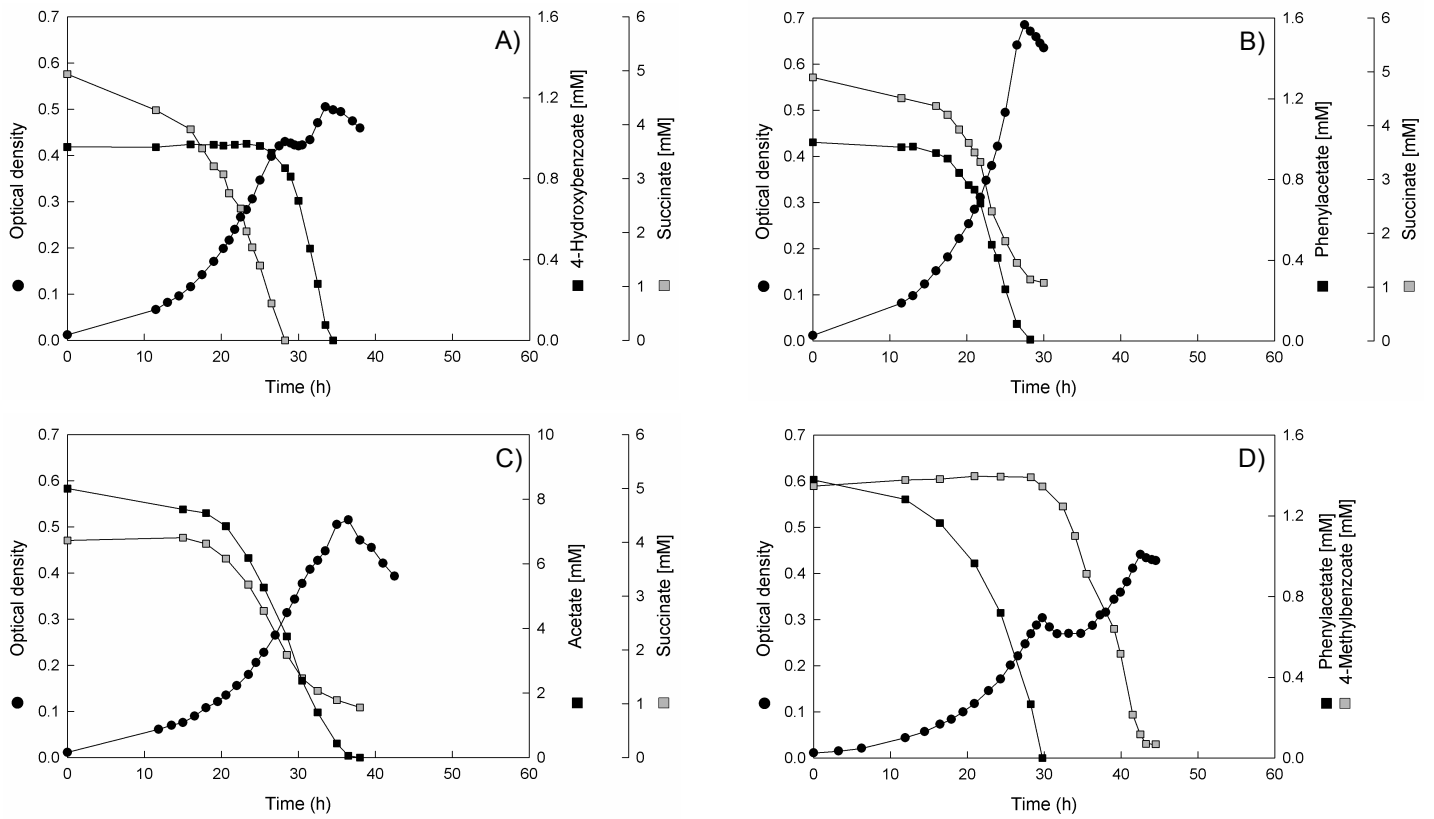

**Figure S1 Anaerobic growth and substrate utilization profiles of *Magnetospirillum* sp. pMbN1 with binary substrate mixtures of (A) succinate and 4-hydroxybenzoate, (B) succinate and phenylacetate, (C) succinate and acetate, and (D) 4-methylbenzoate and phenylacetate. The respective adaptation substrate is always listed first.**

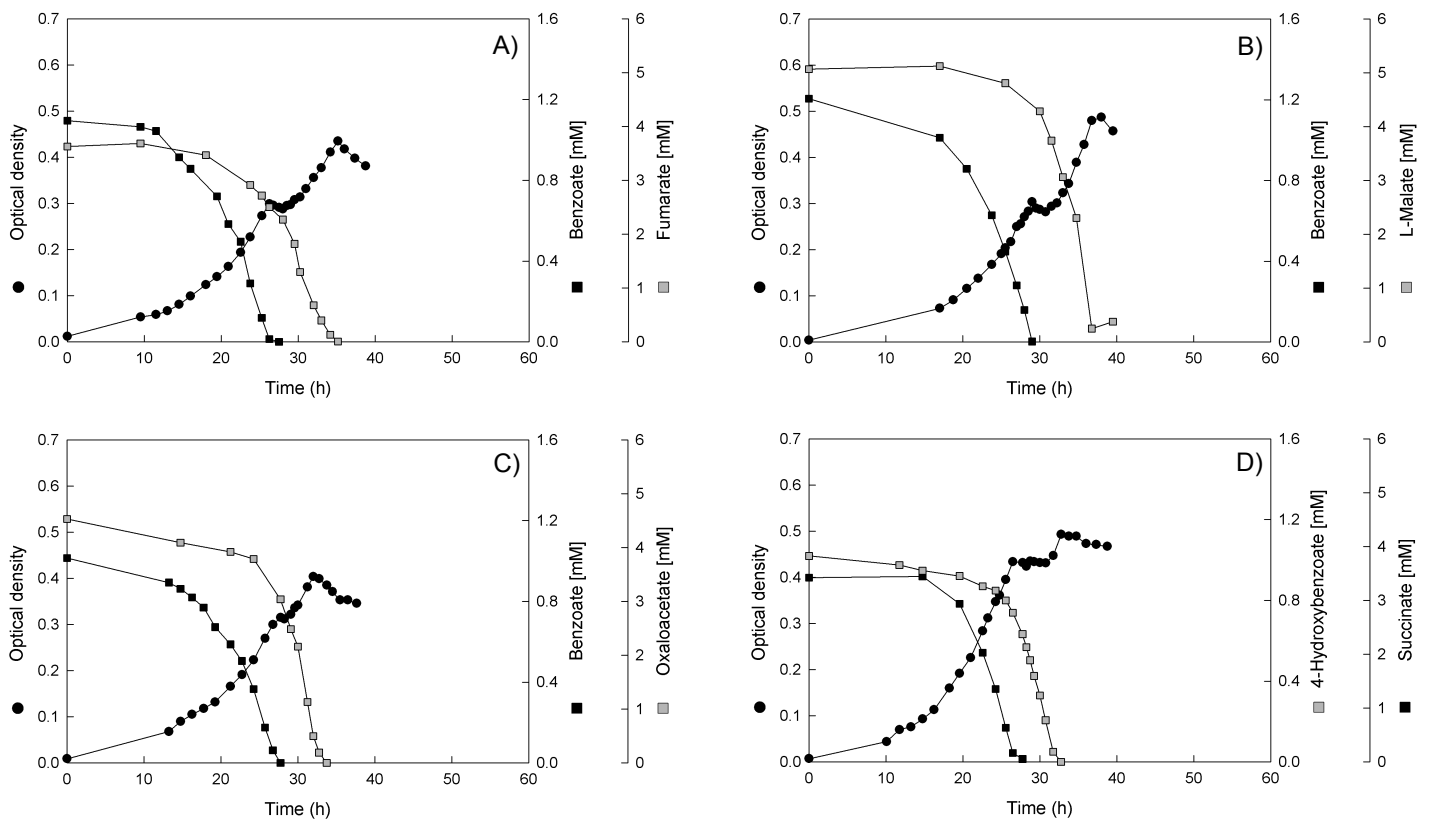

**Figure S2 Anaerobic growth and substrate utilization profiles of *Magnetospirillum* sp. pMbN1 with binary substrate mixtures of (A) fumarate and benzoate, (B) L-malate and benzoate, (C) oxaloacetate and benzoate, and (D) 4-hydroxybenzoate and succinate. The respective adaptation substrate is always listed first.**

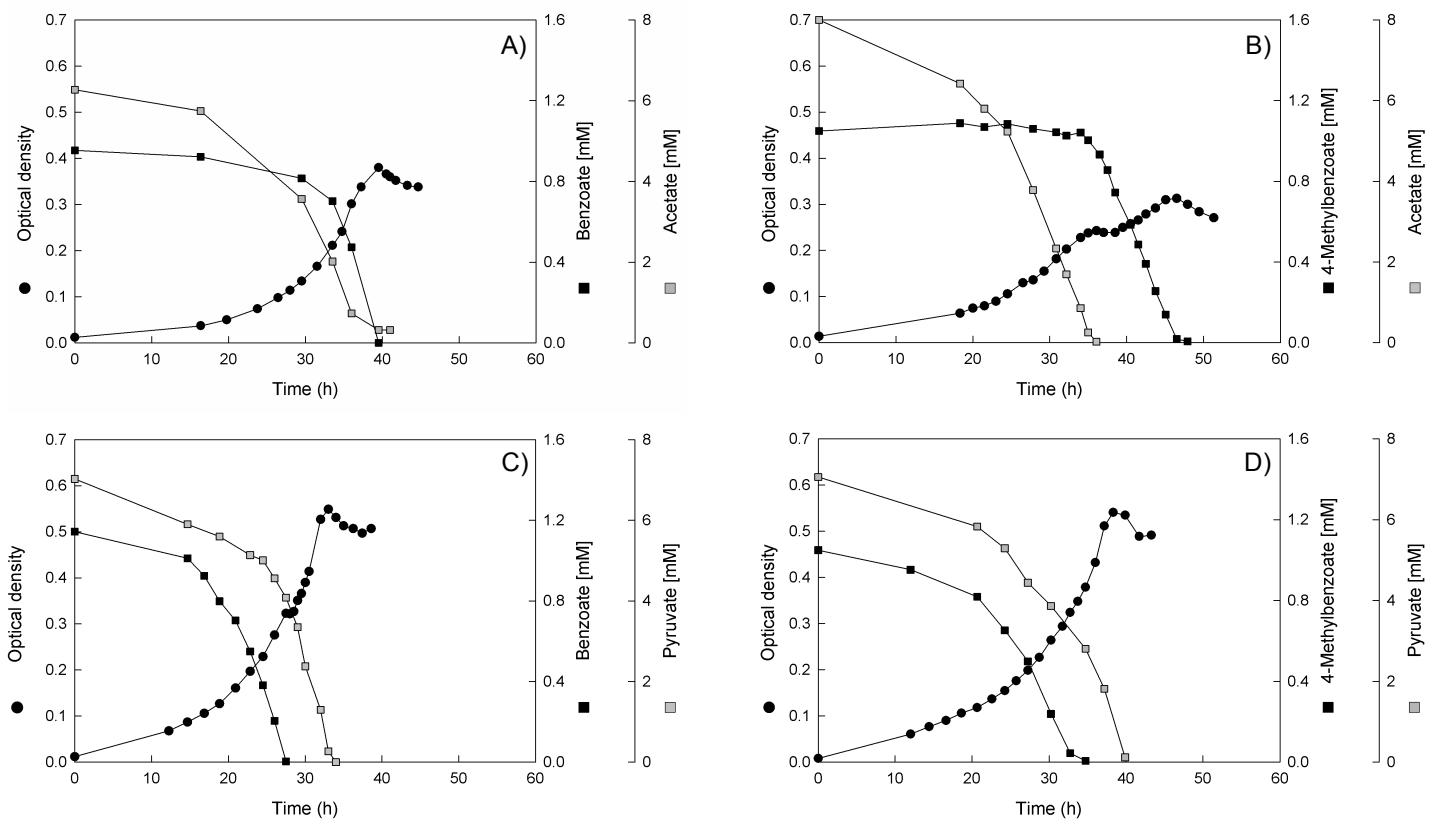

**Figure S3 Anaerobic growth and substrate utilization profiles of *Magnetospirillum* sp. pMbN1 with binary substrate mixtures of (A) acetate and benzoate, (B) acetate and 4-methylbenzoate, (C) pyruvate and benzoate, and (D) pyruvate and 4-methylbenzoate. The respective adaptation substrate is always listed first.**

**Table S1 Fold change in the abundance of soluble proteins during anaerobic growth of *Magnetospirillum* sp. pMbn1 with selected substrate mixtures (reference: succinate-adapted cells).**

| Protein <sup>a</sup>                                                            | Predicted function <sup>a</sup>                                                      | Fold change in abundance compared to that of cells grown with succinate <sup>b</sup> |       |                                |      |      |       |      |       |      |      |           |       |      |      |      |
|---------------------------------------------------------------------------------|--------------------------------------------------------------------------------------|--------------------------------------------------------------------------------------|-------|--------------------------------|------|------|-------|------|-------|------|------|-----------|-------|------|------|------|
|                                                                                 |                                                                                      | Single substrate <sup>c</sup>                                                        |       | Substrate mixture <sup>c</sup> |      |      |       |      |       |      |      |           |       |      |      |      |
|                                                                                 |                                                                                      | B                                                                                    | M     | S + B                          |      |      | S + M |      | M + B |      |      | M + B + S |       |      |      |      |
|                                                                                 |                                                                                      | Ph1                                                                                  | Ph2   | Ph3                            | Ph1a | Ph1b | Ph1   | Ph2  | Ph3   | Ph1  | Ph2a | Ph2b      | Ph3a  | Ph3b |      |      |
| <i>Proteins related to anaerobic benzoate degradation</i>                       |                                                                                      |                                                                                      |       |                                |      |      |       |      |       |      |      |           |       |      |      |      |
| BclA                                                                            | Benzoate-CoA ligase                                                                  | 5.2                                                                                  | 3.7   | 3.4                            | 3.2  | 2.8  | 2.2   | 2.8  | 5.1   | 4.9  | 3.7  | 4.7       | 4.6   | 4.2  | 3.7  | 3.3  |
| BcrA                                                                            | Benzoyl-CoA reductase, $\alpha$ -subunit                                             | 29.3                                                                                 | 20.0  | 18.8                           | 18.4 | 12.3 | 9.5   | 12.7 | 29.0  | 27.8 | 23.3 | 24.3      | 26.1  | 21.7 | 19.5 | 16.9 |
| BcrB                                                                            | Benzoyl-CoA reductase, $\beta$ -subunit                                              | 18.7                                                                                 | 9.4   | 12.1                           | 11.0 | 8.1  | 4.5   | 7.0  | 17.1  | 15.9 | 12.0 | 15.4      | 15.2  | 13.1 | 11.0 | 9.6  |
| BcrC                                                                            | Benzoyl-CoA reductase, $\gamma$ -subunit                                             | 5.4                                                                                  | 3.4   | 3.9                            | 3.7  | 2.9  | 1.7   | 2.6  | 5.6   | 5.2  | 4.1  | 5.0       | 4.8   | 4.4  | 3.7  | 3.3  |
| BcrD                                                                            | Benzoyl-CoA reductase, $\delta$ -subunit                                             | 16.7                                                                                 | 8.0   | 11.5                           | 10.3 | 7.6  | 3.7   | 5.6  | 15.7  | 14.1 | 11.0 | 14.0      | 14.0  | 11.5 | 9.9  | 8.2  |
| Dch-1                                                                           | Cyclohex-1,5-diene-1-carbonyl-CoA hydratase                                          | 17.6                                                                                 | 9.8   | 12.2                           | 10.6 | 8.1  | 4.8   | 7.1  | 16.9  | 15.2 | 12.3 | 15.1      | 15.0  | 13.4 | 11.5 | 10.2 |
| Had-1                                                                           | 6-Hydroxycyclohex-1-ene-1-carbonyl-CoA dehydrogenase                                 | 3.3                                                                                  | 2.9   | 3.1                            | 2.9  | 2.5  | 1.8   | 2.0  | 4.2   | 3.9  | 3.3  | 3.6       | 3.5   | 3.3  | 2.8  | 2.8  |
| Oah-1                                                                           | 6-Oxocyclohex-1-ene-1-carbonyl-CoA hydrolase                                         | 8.9                                                                                  | 5.7   | 6.5                            | 5.8  | 4.8  | 2.9   | 4.0  | 8.9   | 8.4  | 7.2  | 7.8       | 7.5   | 7.0  | 6.6  | 5.9  |
| KorA                                                                            | 2-Oxoacid:ferredoxin oxidoreductase; $\alpha$ -subunit                               | 2.1                                                                                  | 2.3   | 1.6                            | 1.6  | 1.5  | 1.6   | 1.8  | 1.9   | 2.0  | 2.2  | 1.7       | 1.7   | 1.8  | 1.8  | 2.0  |
| KorB                                                                            | 2-Oxoacid:ferredoxin oxidoreductase; $\beta$ -subunit                                | 2.0                                                                                  | 1.8   | 1.5                            | 1.6  | 1.5  | 1.4   | 1.6  | 1.8   | 1.8  | 2.0  | 1.6       | 1.6   | 1.7  | 1.7  | 1.7  |
| <i>Proteins related to uptake and anaerobic degradation of 4-methylbenzoate</i> |                                                                                      |                                                                                      |       |                                |      |      |       |      |       |      |      |           |       |      |      |      |
| Orf870                                                                          | ABC-type transport system, periplasmic solute-binding protein                        | -1.6                                                                                 | 6.2   | 1.2                            | -1.2 | 1.7  | 4.0   | 4.7  | 1.5   | 6.4  | 13.6 | 2.1       | 1.4   | 3.8  | 6.0  | 5.7  |
| MclA                                                                            | Putative 4-methylbenzoate-CoA ligase                                                 | -1.1                                                                                 | 7.2   | -1.2                           | 1.1  | 1.2  | 4.6   | 5.1  | 1.5   | 3.2  | 4.1  | 1.6       | 1.3   | 2.9  | 4.0  | 4.9  |
| MbrA                                                                            | 4-Methylbenzoyl-CoA reductase, $\alpha$ -subunit                                     | -1.3                                                                                 | 113.8 | -1.8                           | -1.0 | -1.8 | 47.5  | 69.3 | 10.1  | 29.3 | 77.3 | 11.6      | 9.3   | 27.9 | 42.6 | 60.1 |
| MbrB                                                                            | 4-Methylbenzoyl-CoA reductase, $\beta$ -subunit                                      | 4.2                                                                                  | 54.0  | 2.3                            | 2.8  | 2.9  | 25.3  | 30.7 | 7.3   | 14.9 | 30.4 | 10.4      | 6.7   | 16.0 | 22.6 | 30.9 |
| MbrC                                                                            | 4-Methylbenzoyl-CoA reductase, $\gamma$ -subunit                                     | 1.2                                                                                  | 47.1  | 1.5                            | 1.3  | 1.4  | 20.4  | 27.4 | 6.1   | 12.1 | 27.9 | 6.5       | 5.5   | 13.3 | 19.3 | 27.4 |
| MbrD                                                                            | 4-Methylbenzoyl-CoA reductase, $\delta$ -subunit                                     | 1.3                                                                                  | 12.0  | 1.2                            | 1.2  | 1.0  | 9.4   | 17.7 | 1.8   | 3.7  | 9.2  | 1.9       | 1.8   | 4.3  | 6.4  | 7.5  |
| Dch-2                                                                           | 4-Methylcyclohex-1,5-diene-1-carbonyl-CoA                                            | 1.5                                                                                  | 4.1   | 1.2                            | 1.4  | 1.4  | 3.1   | 3.2  | 1.6   | 1.8  | 2.5  | 1.7       | 1.6   | 1.9  | 2.2  | 2.6  |
| Had-2                                                                           | 4-Methyl-6-hydroxycyclohex-1-ene-1-carbonyl-CoA dehydrogenase                        | -1.1                                                                                 | 1.8   | -1.0                           | 1.0  | 1.1  | 1.4   | 1.5  | 1.0   | 1.2  | 1.3  | 1.1       | 1.0   | 1.2  | 1.3  | 1.3  |
| Oah-2                                                                           | 4-Methyl-6-oxocyclohex-1-ene-carbonyl-CoA hydrolase                                  | 1.6                                                                                  | 86.3  | 1.2                            | -1.3 | -1.1 | 48.1  | 61.5 | 10.6  | 22.5 | 39.6 | 10.4      | 9.0   | 22.6 | 31.5 | 42.5 |
| <i>Proteins related to succinate uptake and catabolism</i>                      |                                                                                      |                                                                                      |       |                                |      |      |       |      |       |      |      |           |       |      |      |      |
| DctP                                                                            | Periplasmic solute-binding protein of C <sub>4</sub> -dicarboxylate TRAP transporter | -5.0                                                                                 | -6.0  | -2.1                           | -1.5 | 1.4  | -1.7  | -1.9 | -5.7  | -4.8 | -4.4 | -3.4      | -3.4  | -2.4 | -2.0 | -1.7 |
| PdhB                                                                            | Pyruvate dehydrogenase, E1 component                                                 | -11.8                                                                                | -10.5 | -3.7                           | -2.1 | -1.1 | -1.5  | -1.9 | -9.9  | -9.1 | -7.5 | -9.9      | -10.3 | -2.7 | -2.4 | -2.6 |
| LpdA                                                                            | Pyruvate dehydrogenase, E3 component                                                 | -6.6                                                                                 | -6.2  | -2.9                           | -2.0 | -1.2 | -1.4  | -1.9 | -4.9  | -5.6 | -5.3 | -6.2      | -7.0  | -2.5 | -2.4 | -2.5 |

<sup>a</sup> For accession numbers and functional annotation of respective proteins see Additional file 1: Table S4.

<sup>b</sup> Fold changes in protein abundance as determined by 2D DIGE. Values marked in bold were above the applied threshold for significantly changed abundances (>|2.5|).

<sup>c</sup> Abbreviations: B, benzoate; M, 4-methylbenzoate; S, succinate; Ph, phase. For further details see Figure 3.

**Table S2 Abundance changes (ratios) of selected transcripts in cells of *Magnetospirillum* sp. pMbn1 anaerobically grown with benzoate, 4-methylbenzoate or succinate (reference) as single substrates, or ternary substrate mixture (see Figures 1D and 2).**

|                                               |            | Ratio in transcript abundance <sup>a</sup>                                                                    |                                      |            |            |            |            |                             |             |                                                                 |             |               |
|-----------------------------------------------|------------|---------------------------------------------------------------------------------------------------------------|--------------------------------------|------------|------------|------------|------------|-----------------------------|-------------|-----------------------------------------------------------------|-------------|---------------|
| Single substrates                             |            | Mixture of 4-methylbenzoate, benzoate and succinate (sampling points with cultivation time after inoculation) |                                      |            |            |            |            |                             |             |                                                                 |             |               |
| Gene name                                     | Benzoate   | 4-Methylbenzoate                                                                                              | Benzoate utilization phase (phase 1) |            |            |            |            | Diauxic lag phase (phase 2) |             | 4-Methylbenzoate and bulk succinate utilization phase (phase 3) |             |               |
|                                               |            |                                                                                                               | 14.8 h                               | 19.9 h     | 20.9 h     | 21.9 h     | 22.9 h     | 23.4 h                      | 24.9 h      | 26.4 h                                                          | 28.0 h      | 28.9 h        |
| Genes related to benzoate utilization         |            |                                                                                                               |                                      |            |            |            |            |                             |             |                                                                 |             |               |
| <i>bclA</i>                                   | 8<br>± 3   | 3<br>± 2                                                                                                      | 6<br>± 3                             | 4<br>± 1   | 5<br>± 0   | 6<br>± 2   | 5<br>± 1   | 3<br>± 1                    | 1<br>± 1    | 1<br>± 0                                                        | 2<br>± 0    | 4<br>± 1      |
| <i>bcrC</i>                                   | 69<br>± 25 | 34<br>± 14                                                                                                    | 53<br>± 21                           | 48<br>± 22 | 61<br>± 16 | 81<br>± 26 | 60<br>± 7  | 13<br>± 3                   | 2<br>± 0    | 5<br>± 1                                                        | 8<br>± 1    | 16<br>± 5     |
| <i>benK</i>                                   | 6<br>± 3   | 2<br>± 1                                                                                                      | 2<br>± 1                             | 2<br>± 1   | 3<br>± 0   | 3<br>± 1   | 2<br>± 0   | 1<br>± 1                    | -1<br>± 0   | -1<br>± 0                                                       | -1<br>± 0   | 2<br>± 0      |
| Genes related to 4-methylbenzoate utilization |            |                                                                                                               |                                      |            |            |            |            |                             |             |                                                                 |             |               |
| <i>mclA</i>                                   | -2<br>± 1  | 282<br>± 78                                                                                                   | 3<br>± 1                             | 3<br>± 1   | 5<br>± 1   | 9<br>± 1   | 16<br>± 5  | 139<br>± 45                 | 282<br>± 51 | 209<br>± 26                                                     | 230<br>± 22 | 394<br>± 139  |
| <i>mbrC</i>                                   | -1<br>± 1  | 396<br>± 109                                                                                                  | 2<br>± 0                             | 2<br>± 1   | 3<br>± 1   | 6<br>± 2   | 7<br>± 1   | 126<br>± 45                 | 596<br>± 86 | 548<br>± 93                                                     | 571<br>± 87 | 1046<br>± 235 |
| <i>orf870</i>                                 | -2<br>± 1  | 53<br>± 16                                                                                                    | 2<br>± 1                             | 2<br>± 0   | 2<br>± 0   | 2<br>± 0   | 6<br>± 1   | 34<br>± 15                  | 108<br>± 39 | 49<br>± 11                                                      | 57<br>± 24  | 62<br>± 29    |
| Genes related to succinate utilization        |            |                                                                                                               |                                      |            |            |            |            |                             |             |                                                                 |             |               |
| <i>pdhB</i>                                   | -13<br>± 6 | -17<br>± 8                                                                                                    | -19<br>± 8                           | -14<br>± 3 | -11<br>± 3 | -14<br>± 1 | -16<br>± 4 | -19<br>± 6                  | -1<br>± 1   | -5<br>± 1                                                       | -12<br>± 3  | -7<br>± 2     |
| <i>maeB</i>                                   | -9<br>± 5  | -11<br>± 6                                                                                                    | -5<br>± 2                            | -5<br>± 1  | -4<br>± 1  | -4<br>± 1  | -3<br>± 1  | -3<br>± 1                   | -2<br>± 0   | -2<br>± 1                                                       | -3<br>± 1   | -1<br>± 1     |
| <i>dctP</i>                                   | -18<br>± 8 | -19<br>± 7                                                                                                    | -6<br>± 2                            | -8<br>± 3  | -4<br>± 0  | -4<br>± 2  | -4<br>± 2  | -4<br>± 1                   | -2<br>± 0   | -2<br>± 0                                                       | -2<br>± 0   | -1<br>± 2     |
| <i>dctM</i>                                   | -14<br>± 4 | -15<br>± 6                                                                                                    | -5<br>± 2                            | -6<br>± 0  | -5<br>± 1  | -4<br>± 1  | -3<br>± 1  | -3<br>± 1                   | -1<br>± 0   | -2<br>± 0                                                       | -2<br>± 1   | -1<br>± 1     |
| <i>dctA</i>                                   | -18<br>± 7 | -26<br>± 12                                                                                                   | -6<br>± 3                            | -6<br>± 2  | -3<br>± 1  | -4<br>± 1  | -3<br>± 1  | -5<br>± 2                   | -4<br>± 2   | -3<br>± 1                                                       | -3<br>± 1   | -2<br>± 1     |

<sup>a</sup> Ratio of transcript abundance between test and reference (succinate) state. Data used for calculation of transcript abundances is provided in Table S7.

Ratio: > 500 > 250 > 50 > 10 ≥ 5 > -5 ≤ -5 < -10 < -20

**Table S3 Selected proteins identified from membrane protein-enriched fractions of *Magnetospirillum* sp. pMbn1 grown anaerobically with benzoate, 4-methylbenzoate and succinate as single substrates, or ternary mixture (for 1DE gel image see Additional file 1: Figure S4).**

| Protein name <sup>a</sup>                                                     | Predicted function <sup>a</sup>                                    | Single substrates |                  |           | Ternary substrate mixture |          |          |
|-------------------------------------------------------------------------------|--------------------------------------------------------------------|-------------------|------------------|-----------|---------------------------|----------|----------|
|                                                                               |                                                                    | Benzoate          | 4-Methylbenzoate | Succinate | Phase I                   | Phase 2b | Phase 3b |
| <i>Proteins related to benzoate uptake</i>                                    |                                                                    |                   |                  |           |                           |          |          |
| BenK                                                                          | Benzoate/H <sup>+</sup> symporter                                  | 476               | 277              |           | 304                       | 325      | 301      |
| <i>Proteins related to 4-methylbenzoate uptake</i>                            |                                                                    |                   |                  |           |                           |          |          |
| Orf960                                                                        | ABC-type transport system, permease component                      |                   |                  |           |                           |          | 100      |
| Orf950                                                                        | ABC-type transport system, permease component                      |                   | 74               |           |                           | 62       | 185      |
| Orf930                                                                        | ABC-type transport system, ATPase component                        |                   | 115              |           |                           |          | 58       |
| Orf920                                                                        | ABC-type transport system, ATPase component                        |                   | 153              |           |                           | 46       | 133      |
| <i>Proteins related to C<sub>4</sub>-dicarboxylate uptake and degradation</i> |                                                                    |                   |                  |           |                           |          |          |
| DctQ                                                                          | TRAP-type C <sub>4</sub> -dicarboxylate transport system, permease | 82                |                  | 252       |                           | 129      | 157      |
| DctM                                                                          | TRAP-type C <sub>4</sub> -dicarboxylate transport system, permease |                   |                  | 98        | 63                        |          |          |
| DctA                                                                          | C <sub>4</sub> -dicarboxylate/Na <sup>+</sup> symporter            |                   |                  | 254       | 65                        | 113      | 137      |
| MaeB                                                                          | NADP <sup>+</sup> -dependent malic enzyme                          |                   |                  | 93        | 89                        |          |          |
| PdhA                                                                          | Pyruvate dehydrogenase, E1 component, α-subunit                    |                   |                  | 45        |                           |          |          |
| <i>Central metabolism</i>                                                     |                                                                    |                   |                  |           |                           |          |          |
| GltA                                                                          | Citrate synthase                                                   | 114               | 93               |           | 226                       | 99       |          |
| AcnB                                                                          | Aconitase                                                          | 80                | 127              |           | 126                       |          |          |
| Icd                                                                           | Isocitrate dehydrogenase                                           | 244               | 284              |           | 545                       | 174      | 147      |
| SucC                                                                          | Succinyl-CoA ligase, β-subunit                                     | 269               | 297              | 217       | 500                       | 252      | 281      |
| SucD                                                                          | Succinyl-CoA ligase, α-subunit                                     |                   | 76               |           | 151                       | 75       |          |
| SdhB                                                                          | Succinate dehydrogenase, β-subunit                                 |                   |                  |           | 35                        |          |          |
| SdhC                                                                          | Succinate dehydrogenase, γ-subunit                                 | 206               | 166              | 122       |                           | 136      | 172      |
| SdhD                                                                          | Succinate dehydrogenase, δ-subunit                                 | 102               | 102              | 93        | 35                        | 73       | 118      |
| FumA                                                                          | Fumarate hydratase class I                                         | 126               |                  |           | 249                       |          |          |
| Mdh                                                                           | Malate dehydrogenase                                               | 305               | 241              | 173       | 398                       | 290      | 178      |

Mascot score: not detected > 20 > 200 > 500

<sup>a</sup> For accession numbers and functional annotation of respective proteins see Additional file 1: Table S4.

**Table S4 Annotaton of genes related to anaerobic degradation of 4-methylbenzoate, benzoate and succinate in *Magnetospirillum* sp. pMbn1 .**

| Gene identifier                                                | Status <sup>a</sup> | Accession No. <sup>b</sup> | Protein name | Length (amino acids) | INTERPRO                                                                    | relevant BLASTP hit <sup>c</sup> |                                    |          |                      |                            |                                                                              |
|----------------------------------------------------------------|---------------------|----------------------------|--------------|----------------------|-----------------------------------------------------------------------------|----------------------------------|------------------------------------|----------|----------------------|----------------------------|------------------------------------------------------------------------------|
|                                                                |                     |                            |              |                      |                                                                             | Gene name                        | Organism                           | Identity | e-Value              | Accession no. <sup>d</sup> | Predicted function                                                           |
| <b>Genes related to anaerobic 4-methylbenzoate utilization</b> |                     |                            |              |                      |                                                                             |                                  |                                    |          |                      |                            |                                                                              |
| <i>pmbn1w00890</i>                                             | F                   | KF941519                   | MclA         | 549                  | IPR000873                                                                   | <i>bclA</i>                      | <i>Thauera aromatica</i>           | 26%      | $6 \times 10^{-24}$  | Q8GQN9                     | 4-Methylbenzoate-CoA ligase                                                  |
| <i>pmbn1w00500</i>                                             | F                   | KF941520                   | MbrC         | 390                  | IPR010327                                                                   | <i>bcrC</i>                      | <i>Thauera aromatica</i>           | 33%      | $1 \times 10^{-59}$  | O87874                     | 4-Methylbenzoyl-CoA reductase, $\gamma$ -subunit                             |
| <i>pmbn1w00490</i>                                             | F                   | KF941521                   | MbrB         | 450                  | IPR010327                                                                   | <i>bcrB</i>                      | <i>Thauera aromatica</i>           | 33%      | $3 \times 10^{-46}$  | O87875                     | 4-Methylbenzoyl-CoA reductase, $\beta$ -subunit                              |
| <i>pmbn1w00510</i>                                             | F                   | KF941522                   | MbrA         | 269                  | IPR002731, IPR008275                                                        | <i>bcrA</i>                      | <i>Thauera aromatica</i>           | 46%      | $3 \times 10^{-49}$  | O87876                     | 4-Methylbenzoyl-CoA reductase, $\alpha$ -subunit                             |
| <i>pmbn1w00520</i>                                             | F                   | KF941523                   | MbrD         | 291                  | IPR002731, IPR008275                                                        | <i>bcrD</i>                      | <i>Thauera aromatica</i>           | 33%      | $1 \times 10^{-32}$  | O87877                     | 4-Methylbenzoyl-CoA reductase, $\delta$ -subunit                             |
| <i>pmbn1w00830</i>                                             | F                   | KF941524                   | Dch-2        | 257                  | IPR001753, IPR017602                                                        | <i>dch</i>                       | <i>Thauera aromatica</i>           | 64%      | $9 \times 10^{-80}$  | O87873                     | 4-Methylcyclohex-1,5-diene-1-carbonyl-CoA hydratase                          |
| <i>pmbn1w00850</i>                                             | F                   | KF941525                   | Had-2        | 324                  | IPR002085, IPR002328, IPR011032, IPR013149, IPR013154, IPR016040, IPR017614 | <i>had</i>                       | <i>Thauera aromatica</i>           | 64%      | $1 \times 10^{-103}$ | O87871                     | 6-Hydroxy-4-methylcyclohex-1-ene-1-carbonyl-CoA dehydrogenase                |
| <i>pmbn1w00840</i>                                             | F                   | KF941526                   | Oah-2        | 379                  | IPR001753, IPR017613,                                                       | <i>oah</i>                       | <i>Thauera aromatica</i>           | 75%      | $1 \times 10^{-172}$ | O87872                     | 4-Methyl-6-oxocyclohex-1-ene-1-carbonyl-CoA hydrolase                        |
| <i>pmbn1w00880</i>                                             | F                   | KF941527                   | Orf880       | 222                  | IPR001647, IPR009057, IPR011075, IPR015893, IPR023772                       | <i>mb3439c</i>                   | <i>Mycobacterium bovis</i>         | 37%      | $3 \times 10^{-7}$   | P67443                     | TetR-type transcriptional regulator                                          |
| <i>pmbn1w00870</i>                                             | F                   | KF941528                   | Orf870       | 381                  | IPR028081, IPR028082                                                        | <i>amb1552</i>                   | <i>Magnetospirillum magneticum</i> | 60%      | $7 \times 10^{-156}$ | Q2W719                     | ABC-type transport system, periplasmic solute-binding protein                |
| <i>pmbn1w00920</i>                                             | F                   | KF941529                   | Orf920       | 266                  | IPR003439, IPR003593, IPR017871, IPR027417                                  | <i>livF</i>                      | <i>Salmonella typhimurium</i>      | 51%      | $8 \times 10^{-70}$  | P0A191                     | ABC-type transport system, ATP-binding protein                               |
| <i>pmbn1w00930</i>                                             | F                   | KF941530                   | Orf930       | 271                  | IPR003439, IPR003593, IPR017871, IPR027417                                  | <i>braF</i>                      | <i>Pseudomonas aeruginosa</i>      | 42%      | $4 \times 10^{-65}$  | P21629                     | ABC-type transport system, ATP-binding protein                               |
| <i>pmbn1w00950</i>                                             | F                   | KF941531                   | Orf950       | 290                  | IPR001851                                                                   | <i>livH</i>                      | <i>Salmonella typhimurium</i>      | 31%      | $6 \times 10^{-47}$  | P0A2J1                     | ABC-type transport system, permease component                                |
| <i>pmbn1w00960</i>                                             | F                   | KF941532                   | Orf960       | 348                  | IPR001851                                                                   | <i>braE</i>                      | <i>Pseudomonas aeruginosa</i>      | 33%      | $4 \times 10^{-47}$  | P21628                     | ABC-type transport system, permease component                                |
| <b>Genes related to anaerobic benzoate utilization</b>         |                     |                            |              |                      |                                                                             |                                  |                                    |          |                      |                            |                                                                              |
| <i>pmbn1C394_0012</i>                                          | F                   | KF941495                   | BclA         | 528                  | IPR000873, IPR025110, IPR011957                                             | <i>bclA</i>                      | <i>Thauera aromatica</i>           | 60%      | 0.0                  | Q8GQN9                     | Benzoate-CoA ligase (EC 6.2.1.25)                                            |
| <i>pmbn1w00160</i>                                             | F                   | KF941533                   | BcrC         | 391                  | IPR010327, IPR011955                                                        | <i>bcrC</i>                      | <i>Thauera aromatica</i>           | 62%      | $1 \times 10^{-154}$ | O87874                     | Benzoyl-CoA reductase, $\gamma$ -subunit                                     |
| <i>pmbn1w00150</i>                                             | F                   | KF941534                   | BcrB         | 432                  | IPR010327, IPR011955                                                        | <i>bcrB</i>                      | <i>Thauera aromatica</i>           | 75%      | 0.0                  | O87875                     | Benzoyl-CoA reductase, $\beta$ -subunit                                      |
| <i>pmbn1w00140</i>                                             | F                   | KF941535                   | BcrA         | 430                  | IPR002731, IPR008275, IPR011954                                             | <i>bcrA</i>                      | <i>Thauera aromatica</i>           | 72%      | $1 \times 10^{-178}$ | O87876                     | Benzoyl-CoA reductase, $\alpha$ -subunit                                     |
| <i>pmbn1w00130</i>                                             | F                   | KF941536                   | BcrD         | 279                  | IPR002731, IPR008275, IPR011956                                             | <i>bcrD</i>                      | <i>Thauera aromatica</i>           | 74%      | $1 \times 10^{-107}$ | O87877                     | Benzoyl-CoA reductase, $\delta$ -subunit                                     |
| <i>pmbn1w00120</i>                                             | F                   | KF941537                   | Fdx          | 79                   | IPR017896, IPR017900                                                        | <i>fdx</i>                       | <i>Thauera aromatica</i>           | 60%      | $6 \times 10^{-15}$  | O88151                     | Ferredoxin                                                                   |
| <i>pmbn1w00200</i>                                             | F                   | KF941538                   | KorA         | 578                  | IPR002869, IPR002880, IPR005476, IPR009014, IPR015941, IPR019752, IPR022367 | <i>korA</i>                      | <i>Thauera aromatica</i>           | 60%      | 0.0                  | O87870                     | 2-Oxoglutarate:ferredoxin oxidoreductase, $\alpha$ -subunit                  |
| <i>pmbn1w00210</i>                                             | F                   | KF941539                   | KorB         | 279                  | IPR011766                                                                   | <i>korB</i>                      | <i>Thauera aromatica</i>           | 67%      | $1 \times 10^{-111}$ | Q8RJJQ9                    | 2-Oxoglutarate:ferredoxin oxidoreductase, $\beta$ -subunit                   |
| <i>pmbn1w00170</i>                                             | F                   | KF941540                   | Dch-1        | 259                  | IPR001753, IPR017602                                                        | <i>dch</i>                       | <i>Thauera aromatica</i>           | 66%      | $4 \times 10^{-82}$  | O87873                     | Cyclohex-1,5-diene-1-carbonyl-CoA hydratase                                  |
| <i>pmbn1w00190</i>                                             | F                   | KF941541                   | Had-1        | 358                  | IPR002085, IPR002328, IPR011032, IPR013149, IPR013154, IPR016040, IPR017614 | <i>had</i>                       | <i>Thauera aromatica</i>           | 63%      | $1 \times 10^{-114}$ | O87871                     | 6-Hydroxycyclohex-1-ene-1-carbonyl-CoA dehydrogenase                         |
| <i>pmbn1w00180</i>                                             | F                   | KF941542                   | Oah-1        | 377                  | IPR001753, IPR017613                                                        | <i>oah</i>                       | <i>Thauera aromatica</i>           | 79%      | $1 \times 10^{-179}$ | O87872                     | 6-Oxocyclohex-1-ene-1-carbonyl-CoA hydratase                                 |
| <i>pmbn1w04893</i>                                             | D                   | KF941494                   | BenK         | 453                  | IPR005829, IPR011701, IPR016196, IPR020846                                  | <i>benK</i>                      | <i>Acinetobacter</i> sp.           | 49%      | $1 \times 10^{-152}$ | O30513                     | Benzoate/ H <sup>+</sup> symporter                                           |
| <b>Genes related to succinate utilization</b>                  |                     |                            |              |                      |                                                                             |                                  |                                    |          |                      |                            |                                                                              |
| <i>pmbn1C3_00100</i>                                           | F                   | KF941496                   | DctP         | 337                  | IPR004682, IPR018389                                                        | <i>dctP</i>                      | <i>Rhodobacter capsulatus</i>      | 69%      | $6 \times 10^{-153}$ | P37735                     | TRAP-type periplasmic C <sub>4</sub> -dicarboxylate-binding protein          |
| <i>pmbn1C3_00110</i>                                           | F                   | KF941497                   | DctQ         | 233                  | IPR007387                                                                   | <i>dctQ</i>                      | <i>Rhodobacter capsulatus</i>      | 52%      | $7 \times 10^{-64}$  | D5AQF8                     | TRAP-type C <sub>4</sub> -dicarboxylate transport system, permease component |
| <i>pmbn1C3_00120</i>                                           | F                   | KF941498                   | DctM         | 427                  | IPR004681, IPR010656                                                        | <i>dctM</i>                      | <i>Rhodobacter capsulatus</i>      | 77%      | 0.0                  | D5AQF7                     | TRAP-type C <sub>4</sub> -dicarboxylate transport system, permease component |

Table S4 continued

| Gene identifier                            | Status <sup>a</sup> | Accession No. <sup>b</sup> | Protein name | Length (amino acids) | INTERPRO                                                                                                     | relevant BLASTP hit <sup>c</sup> |                                    |          |                      |                            |                                                                                                      |
|--------------------------------------------|---------------------|----------------------------|--------------|----------------------|--------------------------------------------------------------------------------------------------------------|----------------------------------|------------------------------------|----------|----------------------|----------------------------|------------------------------------------------------------------------------------------------------|
|                                            |                     |                            |              |                      |                                                                                                              | Gene name                        | Organism                           | Identity | e-Value              | Accession no. <sup>d</sup> | Predicted function                                                                                   |
| <i>pmbn1C3_00090</i>                       | F                   | KF941499                   | DctS         | 651                  | IPR000014, IPR000700, IPR001610, IPR003594, IPR003661, IPR005467, IPR009082, IPR013767, IPR004358            | <i>dctS</i>                      | <i>Rhodobacter capsulatus</i>      | 42%      | $2 \times 10^{-149}$ | P37739                     | Sensory histidine kinase of C <sub>4</sub> -dicarboxylate-responsive sensory/regulatory system       |
| <i>pmbn1C3_00080</i>                       | F                   | KF941500                   | DctR         | 200                  | IPR000792, IPR001789, IPR011006, IPR011991                                                                   | <i>dctR</i>                      | <i>Rhodobacter capsulatus</i>      | 51%      | $6 \times 10^{-38}$  | P37740                     | DNA-binding response regulator of C <sub>4</sub> -dicarboxylate-responsive sensory/regulatory system |
| <i>pmbn1w02526</i>                         | D                   | KF941501                   | DctA         | 415                  | IPR001991, IPR018107                                                                                         | <i>dctA</i>                      | <i>Sinorhizobium meliloti</i>      | 63%      | $4 \times 10^{-172}$ | P20672                     | C <sub>4</sub> -dicarboxylate/ Na <sup>+</sup> symporter                                             |
| <i>pmbn1w03530</i>                         | D                   | KF941502                   | DctB         | 581                  | IPR003594, IPR003661, IPR005467, IPR009082, IPR017055, IPR004358                                             | <i>dctB</i>                      | <i>Rhizobium leguminosarum</i>     | 34%      | $1 \times 10^{-93}$  | P10047                     | Sensory histidine kinase of C <sub>4</sub> -dicarboxylate-responsive sensory/regulatory system       |
| <i>pmbn1w3533</i>                          | D                   | KF941503                   | DctD         | 446                  | IPR001789, IPR002078, IPR002197, IPR003593, IPR009057, IPR011006, IPR025943, IPR025944, IPR027417            | <i>dctD</i>                      | <i>Sinorhizobium meliloti</i>      | 48%      | $3 \times 10^{-137}$ | P13632                     | DNA-binding response regulator of C <sub>4</sub> -dicarboxylate-responsive sensory/regulatory system |
| <i>pmbn1d03865</i>                         | D                   | KF941505                   | PdhA         | 332                  | IPR017597, IPR001017                                                                                         | <i>pdhA</i>                      | <i>Sinorhizobium meliloti</i>      | 68%      | $3 \times 10^{-154}$ | Q9R9N5                     | Pyruvate dehydrogenase, E1 component, $\alpha$ -subunit                                              |
| <i>pmbn1d03867</i>                         | D                   | KF941506                   | PdhB         | 440                  | IPR000089, IPR003016, IPR005475, IPR005476, IPR009014, IPR011053, IPR015941, IPR027110                       | <i>pdhB</i>                      | <i>Sinorhizobium meliloti</i>      | 63%      | 0.0                  | Q9R9N4                     | Pyruvate dehydrogenase, E1 component, $\beta$ -subunit                                               |
| <i>pmbn1d03876</i>                         | D                   | KF941507                   | LpdA         | 462                  | IPR004099, IPR006258, IPR012999, IPR013027, IPR016156, IPR023753                                             | <i>lpdA</i>                      | <i>Rhizobium etli</i>              | 61%      | 0.0                  | O05940                     | Pyruvate dehydrogenase, E3 component                                                                 |
| <i>pmbn1w00775</i>                         | D                   | KF941504                   | MaeB         | 762                  | IPR002505, IPR012188, IPR012301, IPR012302, IPR016040                                                        | <i>maeB</i>                      | <i>Escherichia coli</i>            | 62%      | 0.0                  | P76558                     | NADP <sup>-</sup> -dependent malic enzyme                                                            |
| <b>Genes related to central metabolism</b> |                     |                            |              |                      |                                                                                                              |                                  |                                    |          |                      |                            |                                                                                                      |
| <i>pmbn1w00530</i>                         | D                   | KF941508                   | GltA         | 438                  | IPR002020, IPR010953, IPR016141, IPR016142, IPR016143, IPR019810, IPR024176                                  | <i>gltA</i>                      | <i>Sinorhizobium meliloti</i>      | 73%      | 0.0                  | O33915                     | Citrate synthase (EC 2.3.3.1)                                                                        |
| <i>pmbn1w03702</i>                         | D                   | KF941509                   | AcnB         | 861                  | IPR001030, IPR004406, IPR015928, IPR015929, IPR015930, IPR015931, IPR015932, IPR018136, IPR015933, IPR015937 | <i>acnB</i>                      | <i>Pseudomonas aeruginosa</i>      | 73%      | 0.0                  | Q912V5                     | Aconitase 2 (EC 4.2.1.3)                                                                             |
| <i>pmbn1w00603</i>                         | D                   | KF941510                   | Icd          | 741                  | IPR004436, IPR024084                                                                                         | <i>icd</i>                       | <i>Azotobacter vinelandii</i>      | 75%      | 0.0                  | P16100                     | Isocitrate dehydrogenase (EC 1.1.1.42)                                                               |
| <i>pmbn1w06208</i>                         | D                   | KF941511                   | SucC         | 398                  | IPR005809, IPR005811, IPR011761, IPR013650, IPR013815, IPR013816, IPR016102                                  | <i>sucC</i>                      | <i>Magnetospirillum magneticum</i> | 97%      | 0.0                  | Q2W063                     | Succinyl-CoA ligase, $\beta$ -subunit (EC 6.2.1.5)                                                   |
| <i>pmbn1w06210</i>                         | D                   | KF941512                   | SucD         | 291                  | IPR003781, IPR005810, IPR005811, IPR016040, IPR016102, IPR017440                                             | <i>sucD</i>                      | <i>Rickettsia bellii</i>           | 78%      | $5 \times 10^{-166}$ | Q1RH56                     | Succinyl-CoA ligase, $\alpha$ -subunit (EC 6.2.1.5)                                                  |
| <i>pmbn1w04352</i>                         | D                   | KF941513                   | SdhA         | 593                  | IPR003952, IPR003953, IPR011281, IPR014006, IPR015939, IPR027477                                             | <i>sdhA</i>                      | <i>Paracoccus denitrificans</i>    | 72%      | 0.0                  | Q59661                     | Succinate dehydrogenase, flavoprotein subunit (EC 1.3.99.1)                                          |
| <i>pmbn1w04353</i>                         | D                   | KF941514                   | SdhB         | 259                  | IPR001041, IPR004489, IPR006058, IPR009051, IPR012285, IPR012675, IPR017900, IPR017896, IPR025192            | <i>sdhB</i>                      | <i>Rickettsia bellii</i>           | 72%      | $4 \times 10^{-139}$ | Q1RGP3                     | Succinate dehydrogenase, iron-sulfur subunit                                                         |
| <i>pmbn1w04350</i>                         | D                   | KF941515                   | SdhC         | 109                  | IPR000701, IPR014314, IPR014361, IPR018495                                                                   | <i>sdhC</i>                      | <i>Paracoccus denitrificans</i>    | 45%      | $4 \times 10^{-24}$  | Q59659                     | Succinate dehydrogenase, cytochrome <i>b</i> <sub>556</sub> subunit                                  |
| <i>pmbn1w04351</i>                         | D                   | KF941516                   | SdhD         | 126                  | IPR000701, IPR014312                                                                                         | <i>sdhD</i>                      | <i>Rickettsia bellii</i>           | 39%      | $8 \times 10^{-19}$  | Q1RHB6                     | Succinate dehydrogenase, hydrophobic membrane anchor subunit                                         |
| <i>pmbn1w01837</i>                         | D                   | KF941517                   | FumA         | 538                  | IPR004646, IPR004647, IPR011167, IPR020557                                                                   | <i>fumA</i>                      | <i>Salmonella typhimurium</i>      | 67%      | 0.0                  | P40720                     | Fumarate hydratase class I (Fumarase) (EC 4.2.1.2)                                                   |
| <i>pmbn1w06206</i>                         | D                   | KF941518                   | Mdh          | 319                  | IPR001236, IPR001557, IPR011275, IPR015955, IPR016040, IPR022383                                             | <i>mdh</i>                       | <i>Magnetospirillum magneticum</i> | 99%      | 0.0                  | Q2W064                     | Malate dehydrogenase (EC 1.1.1.37)                                                                   |

<sup>a</sup> Status of DNA sequence: F, finished; D, draft.

<sup>b</sup> GenBank accession number.

<sup>c</sup> Proteins related to the anaerobic degradation of 4-methylbenzoate and benzoate were compared to protein sequences of biochemically characterized proteins of *Thauera aromatica* K172.

<sup>d</sup> UniProtKB/Swiss-Prot accession number.



**Table S5 Anaerobic growth of *Magnetospirillum* sp. pMbN1 with aliphatic and aromatic acids supplied as single substrates.**

| From experiment with binary mixture of:       |                               | Growth with single substrates |                                     |                   |                                     |
|-----------------------------------------------|-------------------------------|-------------------------------|-------------------------------------|-------------------|-------------------------------------|
|                                               |                               | Adaptation substrate          |                                     | Co-substrate      |                                     |
| Adaptation substrate                          | Co-substrate                  | OD <sub>max</sub>             | μ <sub>max</sub> (h <sup>-1</sup> ) | OD <sub>max</sub> | μ <sub>max</sub> (h <sup>-1</sup> ) |
| <i>Cells adapted to succinate</i>             |                               |                               |                                     |                   |                                     |
| Succinate (5 mM)                              | <b>Benzoate (1 mM)</b>        | 0.38                          | 0.21                                | 0.18              | 0.21                                |
| Succinate (5 mM)                              | 4-Methylbenzoate (1 mM)       | 0.38                          | 0.21                                | 0.15              | 0.13                                |
| <b>Succinate (5 mM)</b>                       | 4-Hydroxybenzoate (1 mM)      | 0.36                          | 0.20                                | ND                | ND                                  |
| Succinate (5 mM)                              | Phenylacetate (1 mM)          | 0.36                          | 0.20                                | 0.19              | 0.16                                |
| Succinate (5 mM)                              | Acetate (8 mM)                | 0.36                          | 0.20                                | 0.30              | 0.22                                |
| <i>Cells adapted to 4-methylbenzoate</i>      |                               |                               |                                     |                   |                                     |
| 4-Methylbenzoate (1.5 mM)                     | <b>Benzoate (1.5 mM)</b>      | 0.27                          | 0.16                                | 0.28              | 0.15                                |
| 4-Methylbenzoate (1.5 mM)                     | <b>Phenylacetate (1.5 mM)</b> | 0.27                          | 0.16                                | 0.32              | 0.16                                |
| <i>Cells adapted to other aliphatic acids</i> |                               |                               |                                     |                   |                                     |
| Acetate (8 mM)                                | Benzoate (1 mM)               | 0.27                          | 0.18                                | 0.17              | 0.20                                |
| <b>Acetate (8 mM)</b>                         | 4-Methylbenzoate (1 mM)       | 0.27                          | 0.18                                | 0.18              | 0.19                                |
| Pyruvate (6 mM)                               | <b>Benzoate (1 mM)</b>        | 0.34                          | 0.18                                | 0.18              | 0.21                                |
| Pyruvate (6 mM)                               | 4-Methylbenzoate (1 mM)       | 0.34                          | 0.18                                | 0.19              | 0.16                                |
| Fumarate (5 mM)                               | <b>Benzoate (1 mM)</b>        | 0.37                          | 0.27                                | 0.19              | 0.17                                |
| L-Malate (5 mM)                               | <b>Benzoate (1 mM)</b>        | 0.37                          | 0.33                                | 0.16              | 0.25                                |
| Oxaloacetate (6 mM)                           | <b>Benzoate (1 mM)</b>        | 0.27                          | 0.20                                | 0.17              | 0.23                                |
| <i>Cells adapted to other aromatic acids</i>  |                               |                               |                                     |                   |                                     |
| 4-Hydroxybenzoate (1 mM)                      | <b>Succinate (5 mM)</b>       | 0.13                          | 0.20                                | 0.34              | 0.10                                |

Preferentially utilized substrates are highlighted in boldface (see Table 1). Applied substrate concentrations are indicated in parentheses. Values for maximal optical density (OD<sub>max</sub>) and maximum specific growth rates (μ<sub>max</sub>) are based on at least two replicate cultures yielding a standard deviation of <5%. μ<sub>max</sub> was calculated from the slope of the active growth phase (*m*): μ<sub>max</sub> = *m* × 1/ΔOD. ND, not determined.

**Table S6 Primers used for reverse transcription real-time PCR.**

| Primer                     | Sequence (5'→ 3')                                     | Target gene   | Product length (bp) | Real-time detection temperature (°C) |
|----------------------------|-------------------------------------------------------|---------------|---------------------|--------------------------------------|
| benK 391F<br>benK 550R     | GTGGCGCTGATGACCGAATACG<br>GAACCGCCGCCACGAAGAACAC      | <i>benK</i>   | 160                 | 84                                   |
| bcrC 809F<br>bcrC 963R     | CAGCTTCCAGATGCCCCGACAGGTT<br>TCATCCACGGGACGCTTACTATCA | <i>bcrC</i>   | 155                 | 83                                   |
| bclA 125F<br>bclA 276R     | CCGACGGCAGCCACACCTAC<br>CTTGACGGGCCCCAGAAC            | <i>bclA</i>   | 152                 | 83                                   |
| orf870 457F<br>orf870 615R | TCGGGGCGTGAGCAGAC<br>GGCCCCCGTCCCGAATAC               | <i>orf870</i> | 159                 | 82                                   |
| mbrC 723F<br>mbrC 872R     | ATAAAATGCGGGTGGTGTGGAAGG<br>GGTCGCCCCGAGTATTGATGTCC   | <i>mbrC</i>   | 150                 | 83                                   |
| mclA 217F<br>mclA 399R     | CGCTTCGCCCCGTGGTCTCTAC<br>GCCCCGATGTGCAATAAGGTC       | <i>mclA</i>   | 183                 | 83                                   |
| dctA 728F<br>dctA 879R     | TGCTGGTCGGCTTCAACATCTTCA<br>CACCAGGCCGACCACCGACTT     | <i>dctA</i>   | 152                 | 84                                   |
| dctP 319F<br>dctP 495R     | TCTTCGACCTGCCCTACATCTTCC<br>GTCGGCGGGGTCTTGAGC        | <i>dctP</i>   | 176                 | 84                                   |
| dctM 181F<br>dctM 344R     | TTCTTCATCCTGGCGGGCAACTT<br>ACGGTGGCGGGGCTGGAG         | <i>dctM</i>   | 164                 | 87                                   |
| pdhB 716F<br>pdhB 877R     | GCGCCCAGCACAGCCAGGATTA<br>TCTGGCCGTAGAGCAGTTCGTTTTTC  | <i>pdhB</i>   | 161                 | 84                                   |
| maeB 1121F<br>maeB 1286R   | CCTTCGGGCCGGAATACCTGA<br>CCGAGCGGAACACGAACTGGT        | <i>maeB</i>   | 165                 | 84                                   |

**Table S7 Average cycle threshold (C<sub>T</sub>) values and efficiencies (E) obtained from reverse transcription real-time PCR reactions.**

| Average C <sub>T</sub> values and efficiencies <sup>a</sup> : |                |               |                  |               |                |                                                                                                  |                                      |               |                |               |                |               |                             |               |                |               |                                                                 |               |                |               |                |               |                |               |                |               |
|---------------------------------------------------------------|----------------|---------------|------------------|---------------|----------------|--------------------------------------------------------------------------------------------------|--------------------------------------|---------------|----------------|---------------|----------------|---------------|-----------------------------|---------------|----------------|---------------|-----------------------------------------------------------------|---------------|----------------|---------------|----------------|---------------|----------------|---------------|----------------|---------------|
| Single substrate                                              |                |               |                  |               |                | Ternary mixture of 4-methylbenzoate, benzoate and succinate (cultivation time after inoculation) |                                      |               |                |               |                |               |                             |               |                |               |                                                                 |               |                |               |                |               |                |               |                |               |
| Gene name                                                     | Benzoate       |               | 4-Methylbenzoate |               | Succinate      |                                                                                                  | Benzoate utilization phase (phase 1) |               |                |               |                |               | Diauxic lag phase (phase 2) |               |                |               | 4-Methylbenzoate and bulk succinate utilization phase (phase 3) |               |                |               |                |               |                |               |                |               |
|                                                               | C <sub>T</sub> | E             | C <sub>T</sub>   | E             | C <sub>T</sub> | E                                                                                                | 14.8 h                               |               | 19.9 h         |               | 20.9 h         |               | 21.9 h                      |               | 22.9 h         |               | 23.4 h                                                          |               | 24.9 h         |               | 26.4 h         |               | 28.0 h         |               | 28.9 h         |               |
|                                                               | C <sub>T</sub> | E             | C <sub>T</sub>   | E             | C <sub>T</sub> | E                                                                                                | C <sub>T</sub>                       | E             | C <sub>T</sub> | E             | C <sub>T</sub> | E             | C <sub>T</sub>              | E             | C <sub>T</sub> | E             | C <sub>T</sub>                                                  | E             | C <sub>T</sub> | E             | C <sub>T</sub> | E             | C <sub>T</sub> | E             | C <sub>T</sub> | E             |
| <i>bclA</i>                                                   | 24.4<br>±1.0   | 1.79<br>±0.04 | 25.5<br>±0.9     | 1.81<br>±0.04 | 27.4<br>±0.6   | 1.78<br>±0.06                                                                                    | 24.4<br>±0.7                         | 1.72<br>±0.05 | 25.1<br>±0.3   | 1.77<br>±0.06 | 24.8<br>±0.1   | 1.84<br>±0.07 | 24.5<br>±0.5                | 1.77<br>±0.05 | 24.6<br>±0.5   | 1.82<br>±0.06 | 25.4<br>±0.4                                                    | 1.86<br>±0.05 | 27.5<br>±0.3   | 1.81<br>±0.03 | 27.1<br>±0.2   | 1.79<br>±0.04 | 26.4<br>±0.3   | 1.83<br>±0.06 | 25.1<br>±0.4   | 1.82<br>±0.07 |
| <i>bcrC</i>                                                   | 20.8<br>±0.8   | 1.85<br>±0.03 | 21.7<br>±0.6     | 1.83<br>±0.04 | 27.7<br>±0.6   | 1.77<br>±0.06                                                                                    | 21.0<br>±0.6                         | 1.74<br>±0.08 | 21.1<br>±0.6   | 1.78<br>±0.05 | 20.8<br>±0.4   | 1.86<br>±0.02 | 20.3<br>±0.5                | 1.77<br>±0.04 | 20.8<br>±0.2   | 1.73<br>±0.06 | 23.4<br>±0.4                                                    | 1.88<br>±0.06 | 26.8<br>±0.0   | 1.83<br>±0.03 | 25.0<br>±0.3   | 1.79<br>±0.07 | 24.2<br>±0.3   | 1.77<br>±0.05 | 23.0<br>±0.5   | 1.88<br>±0.04 |
| <i>benK</i>                                                   | 24.4<br>±0.7   | 1.87<br>±0.05 | 26.1<br>±0.5     | 1.87<br>±0.07 | 27.2<br>±0.5   | 1.84<br>±0.07                                                                                    | 25.8<br>±0.6                         | 1.99<br>±0.04 | 26.1<br>±0.4   | 1.86<br>±0.07 | 25.7<br>±0.2   | 1.84<br>±0.03 | 25.5<br>±0.6                | 1.91<br>±0.06 | 26.0<br>±0.2   | 1.82<br>±0.05 | 26.9<br>±0.4                                                    | 1.89<br>±0.08 | 27.8<br>±0.3   | 1.83<br>±0.05 | 27.7<br>±0.2   | 1.87<br>±0.05 | 27.9<br>±0.4   | 1.91<br>±0.06 | 26.6<br>±0.3   | 1.90<br>±0.04 |
| <i>mclA</i>                                                   | 29.9<br>±0.7   | 1.83<br>±0.05 | 19.9<br>±0.6     | 1.86<br>±0.04 | 28.7<br>±0.5   | 1.84<br>±0.06                                                                                    | 26.9<br>±0.5                         | 1.86<br>±0.03 | 26.8<br>±0.3   | 1.83<br>±0.04 | 26.2<br>±0.2   | 1.83<br>±0.04 | 25.2<br>±0.2                | 1.81<br>±0.02 | 24.3<br>±0.5   | 1.82<br>±0.06 | 20.7<br>±0.5                                                    | 1.87<br>±0.01 | 19.6<br>±0.3   | 1.89<br>±0.07 | 20.1<br>±0.2   | 1.90<br>±0.02 | 20.0<br>±0.2   | 1.91<br>±0.05 | 19.0<br>±0.6   | 1.91<br>±0.03 |
| <i>mbrC</i>                                                   | 27.7<br>±1.0   | 1.81<br>±0.04 | 17.5<br>±0.4     | 1.98<br>±0.06 | 27.1<br>±0.7   | 1.80<br>±0.05                                                                                    | 26.0<br>±0.2                         | 1.83<br>±0.06 | 26.3<br>±0.9   | 1.84<br>±0.03 | 25.4<br>±0.3   | 1.87<br>±0.05 | 24.4<br>±0.5                | 1.80<br>±0.05 | 24.2<br>±0.1   | 1.78<br>±0.06 | 19.3<br>±0.5                                                    | 1.80<br>±0.06 | 16.8<br>±0.2   | 1.94<br>±0.04 | 17.0<br>±0.3   | 1.90<br>±0.03 | 16.9<br>±0.2   | 1.88<br>±0.05 | 15.9<br>±0.4   | 1.90<br>±0.04 |
| <i>orf870</i>                                                 | 27.8<br>±0.7   | 1.85<br>±0.07 | 20.5<br>±0.7     | 1.90<br>±0.05 | 26.8<br>±0.7   | 1.74<br>±0.06                                                                                    | 26.0<br>±0.6                         | 1.80<br>±0.05 | 26.1<br>±0.3   | 1.86<br>±0.06 | 25.9<br>±0.1   | 1.82<br>±0.04 | 25.5<br>±0.1                | 1.83<br>±0.06 | 24.0<br>±0.2   | 1.88<br>±0.05 | 20.9<br>±0.7                                                    | 1.79<br>±0.06 | 19.1<br>±0.6   | 1.81<br>±0.07 | 20.4<br>±0.4   | 1.86<br>±0.05 | 20.1<br>±0.6   | 1.87<br>±0.04 | 19.9<br>±0.8   | 1.75<br>±0.04 |
| <i>pdhB</i>                                                   | 25.6<br>±0.7   | 1.87<br>±0.06 | 26.1<br>±0.7     | 1.89<br>±0.06 | 21.5<br>±0.7   | 1.94<br>±0.07                                                                                    | 26.2<br>±0.7                         | 1.86<br>±0.04 | 25.8<br>±0.3   | 1.85<br>±0.06 | 25.4<br>±0.5   | 1.91<br>±0.04 | 25.8<br>±0.2                | 1.93<br>±0.06 | 26.0<br>±0.4   | 1.86<br>±0.06 | 26.3<br>±0.5                                                    | 1.89<br>±0.04 | 22.2<br>±0.5   | 1.88<br>±0.02 | 24.1<br>±0.4   | 1.85<br>±0.06 | 25.6<br>±0.4   | 1.83<br>±0.07 | 24.8<br>±0.5   | 1.94<br>±0.04 |
| <i>maeB</i>                                                   | 25.9<br>±0.8   | 1.84<br>±0.04 | 26.1<br>±1.0     | 1.85<br>±0.04 | 22.3<br>±0.8   | 1.84<br>±0.05                                                                                    | 24.8<br>±0.8                         | 1.83<br>±0.04 | 25.1<br>±0.4   | 1.85<br>±0.07 | 24.7<br>±0.3   | 1.86<br>±0.05 | 24.5<br>±0.6                | 1.79<br>±0.03 | 24.3<br>±0.3   | 1.83<br>±0.06 | 24.0<br>±0.8                                                    | 1.96<br>±0.05 | 23.2<br>±0.4   | 1.85<br>±0.04 | 23.1<br>±0.6   | 1.86<br>±0.03 | 24.2<br>±0.6   | 1.87<br>±0.07 | 22.7<br>±0.4   | 1.88<br>±0.07 |
| <i>dctP</i>                                                   | 23.5<br>±0.7   | 1.85<br>±0.04 | 23.7<br>±0.6     | 1.86<br>±0.06 | 18.8<br>±0.6   | 1.83<br>±0.05                                                                                    | 21.8<br>±0.5                         | 1.78<br>±0.05 | 22.3<br>±0.6   | 1.84<br>±0.06 | 21.3<br>±0.1   | 1.85<br>±0.05 | 21.3<br>±0.8                | 1.77<br>±0.04 | 21.2<br>±0.6   | 1.75<br>±0.06 | 21.1<br>±0.4                                                    | 1.91<br>±0.06 | 19.7<br>±0.3   | 1.87<br>±0.03 | 19.9<br>±0.4   | 1.93<br>±0.06 | 19.9<br>±0.4   | 1.88<br>±0.06 | 18.9<br>±0.7   | 1.86<br>±0.04 |
| <i>dctM</i>                                                   | 27.6<br>±0.5   | 1.76<br>±0.07 | 27.7<br>±0.6     | 1.79<br>±0.06 | 23.1<br>±0.5   | 1.84<br>±0.06                                                                                    | 25.9<br>±0.5                         | 1.84<br>±0.05 | 26.2<br>±0.1   | 1.83<br>±0.06 | 25.8<br>±0.2   | 1.81<br>±0.05 | 25.5<br>±0.2                | 1.76<br>±0.07 | 25.3<br>±0.4   | 1.87<br>±0.04 | 24.9<br>±0.6                                                    | 1.77<br>±0.06 | 23.9<br>±0.3   | 1.78<br>±0.05 | 24.5<br>±0.3   | 1.84<br>±0.05 | 24.7<br>±0.4   | 1.83<br>±0.07 | 23.5<br>±0.5   | 1.71<br>±0.04 |
| <i>dctA</i>                                                   | 25.5<br>±0.9   | 1.89<br>±0.05 | 26.5<br>±0.9     | 1.87<br>±0.03 | 20.9<br>±0.7   | 1.86<br>±0.06                                                                                    | 23.9<br>±0.8                         | 1.82<br>±0.06 | 24.0<br>±0.5   | 1.83<br>±0.07 | 23.0<br>±0.3   | 1.86<br>±0.06 | 23.1<br>±0.3                | 1.82<br>±0.05 | 22.9<br>±0.6   | 1.81<br>±0.07 | 23.7<br>±0.5                                                    | 1.82<br>±0.05 | 23.2<br>±0.6   | 1.82<br>±0.06 | 22.8<br>±0.4   | 1.85<br>±0.05 | 22.9<br>±0.4   | 1.89<br>±0.04 | 22.0<br>±0.5   | 1.87<br>±0.03 |

<sup>a</sup> The lower value represents the standard deviation. The efficiencies were determined as described in the Methods section. The average efficiency per primer pair was used to calculate the ratios in Table S2.
